# Supplementary material
Source: publisher figshare collection journal article supplement (https://aacr.figshare.com/articles/dataset/_/22651590)
Supplement: Supplementary file 1 [file 40209243]

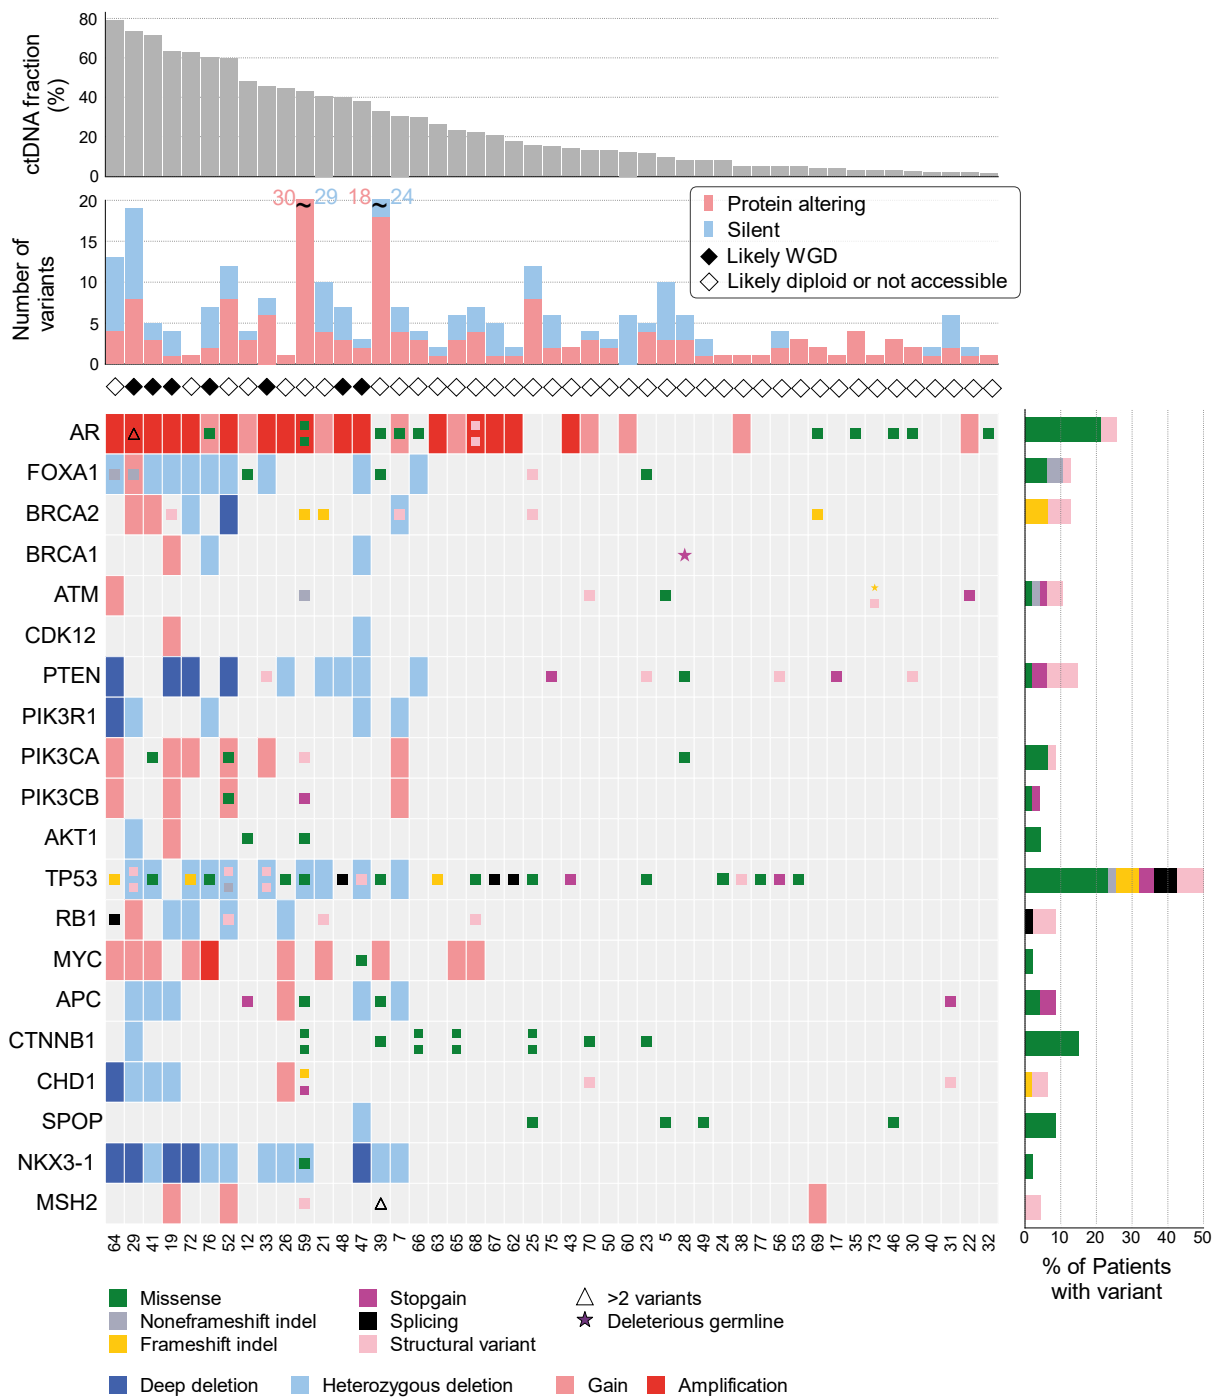

**Supplementary Figure S3.** Oncoprint showing the copy number alterations, structural variants and mutations per patient at baseline.
